# Supplementary material for: Association of Standardized Parenteral Nutrition with Early Neonatal Growth of Moderately Preterm Infants: A Population-Based Cohort Study
Source: MDPI journal article supplement (doi:10.3390/nu16091292), 2024-04-26
Supplement: s1 [file s1]

**Table S1:** Composition of 3-in-1 standardized parenteral nutrition solutions.

|                                  | <b>Solution 1</b> | <b>Solution 2</b> | <b>Solution 3</b> |
|----------------------------------|-------------------|-------------------|-------------------|
| <b>Volume, mL</b>                | 250               | 400               | 400               |
| <b>Osmolarity, mOsm/L</b>        | 714               | 780               | 960               |
| <b>Per 100 ml</b>                |                   |                   |                   |
| <b>Total calories, kcal</b>      | 49                | 61                | 74                |
| <b>Glucose, g</b>                | 8                 | 9                 | 10.7              |
| <b>Amino acids, g</b>            | 2                 | 2.2               | 2.7               |
| <b>Lipids, g</b>                 | 1                 | 1.8               | 2.2               |
| <b>Sodium, mmol</b>              | 2                 | 2.2               | 2.5               |
| <b>Potassium, mmol</b>           | 2                 | 1.4               | 1.7               |
| <b>Magnesium, mmol</b>           | 0.3               | 0.2               | 0.2               |
| <b>Calcium, mmol</b>             | 1.3               | 0.8               | 1.2               |
| <b>Phosphate, mmol</b>           | 1                 | 1                 | 1.2               |
| <b>Chloride, mmol/l</b>          | 1.6               | 1.6               | 2.1               |
| <b>Carnitine, mg</b>             | 8                 | 8                 | 5.7               |
| <b>Vitamin A, IU</b>             | 460               | 460               | 320               |
| <b>Vitamin D<sub>2</sub>, IU</b> | 80                | 80                | 56                |
| <b>Vitamin E, IU</b>             | 1.4               | 1.4               | 1                 |
| <b>Phytomenadione, µg</b>        | 40                | 40                | 28                |
| <b>Ascorbate, mg</b>             | 11                | 11                | 8                 |
| <b>Thiamine, µg</b>              | 250               | 250               | 175               |
| <b>Riboflavine, µg</b>           | 360               | 360               | 250               |
| <b>Pyridoxine, µg</b>            | 400               | 400               | 280               |
| <b>Nicotinamide, mg</b>          | 4                 | 4                 | 2.8               |
| <b>Pantothenate, mg</b>          | 1.6               | 1.6               | 1.1               |
| <b>Biotin, µg</b>                | 6                 | 6                 | 4                 |
| <b>Folate, µg</b>                | 40                | 40                | 25                |
| <b>Cyanocobalamine, µg</b>       | 0.5               | 0.5               | 0.3               |
| <b>Zinc, µg</b>                  | 60                | 100               | 315               |
| <b>Copper, µg</b>                | 12                | 20                | 13                |
| <b>Manganese, µg</b>             | 0.3               | 0.5               | 0.3               |
| <b>Iodine, µg</b>                | 0.6               | 1                 | 0.6               |
| <b>Selenium, µg</b>              | 1.2               | 2                 | 1.3               |
